# Supplementary material for: Differences in Reference Evapotranspiration Variation and Climate-Driven Patterns in Different Altitudes of the Qinghai–Tibet Plateau (1961–2017)
Source: MDPI journal article supplement (doi:10.3390/w13131749), 2021-06-24
Supplement: s1 [file s1]

# Differences in Reference Evapotranspiration Variation and Climate-Driven Patterns in Different Altitudes of the Qinghai–Tibet Plateau (1961–2017)

Yuan Liu, Xiaolei Yao, Qianyang Wang, Jingshan Yu\*, Qi Jiang, Weiwei Jiang and Luyi Li

**Table S1.** The *p*-value of the raw sequence and the converted sequence by LB test.

| Station Number | Zone   | Annual Series |       | Spring Series |       | Summer Series |       | Autumn Series |       | Winter Series |       |
|----------------|--------|---------------|-------|---------------|-------|---------------|-------|---------------|-------|---------------|-------|
|                |        | Raw           | After |
| 52602          | Low    | 0.000         | 0.605 | 0.177         | -     | 0.000         | 0.552 | 0.000         | 0.834 | 0.289         | -     |
| 52657          | Low    | 0.018         | 0.953 | 0.041         | 0.911 | 0.441         | -     | 0.125         | -     | 0.079         | -     |
| 52825          | Low    | 0.000         | 0.227 | 0.000         | 0.611 | 0.000         | 0.129 | 0.000         | 0.464 | 0.722         | -     |
| 52866          | Low    | 0.000         | 0.178 | 0.016         | 0.426 | 0.000         | 0.175 | 0.000         | 0.707 | 0.614         | -     |
| 52868          | Low    | 0.008         | 0.640 | 0.118         | -     | 0.071         | -     | 0.055         | -     | 0.001         | 0.840 |
| 52974          | Low    | 0.003         | 0.724 | 0.038         | 0.743 | 0.021         | 0.919 | 0.581         | -     | 0.054         | -     |
| 56172          | Low    | 0.000         | 0.309 | 0.011         | 0.971 | 0.154         | -     | 0.001         | 0.366 | 0.035         | 0.528 |
| 56178          | Low    | 0.000         | 0.594 | 0.045         | 0.987 | 0.099         | -     | 0.072         | -     | 0.003         | 0.413 |
| 56374          | Low    | 0.046         | 0.847 | 0.417         | -     | 0.742         | -     | 0.068         | -     | 0.818         | -     |
| 56459          | Low    | 0.000         | 0.080 | 0.110         | -     | 0.012         | 0.689 | 0.000         | 0.353 | 0.003         | 0.275 |
| 56533          | Low    | 0.204         | -     | 0.298         | -     | 0.317         | -     | 0.204         | -     | 0.090         | -     |
| 51804          | Medium | 0.000         | 0.466 | 0.117         | -     | 0.000         | 0.394 | 0.000         | 0.325 | 0.053         | -     |
| 51886          | Medium | 0.000         | 0.372 | 0.315         | -     | 0.000         | 0.223 | 0.000         | 0.800 | 0.011         | 0.363 |
| 52713          | Medium | 0.010         | 0.616 | 0.000         | 0.724 | 0.573         | -     | 0.000         | 0.705 | 0.000         | 0.370 |
| 52737          | Medium | 0.000         | 0.627 | 0.000         | 0.875 | 0.000         | 0.524 | 0.000         | 0.986 | 0.013         | 0.402 |
| 52754          | Medium | 0.453         | -     | 0.066         | -     | 0.596         | -     | 0.585         | -     | 0.506         | -     |
| 52765          | Medium | 0.016         | 0.925 | 0.033         | 0.635 | 0.638         | -     | 0.977         | -     | 0.469         | -     |
| 52818          | Medium | 0.000         | 0.668 | 0.048         | 0.917 | 0.000         | 0.368 | 0.000         | 0.987 | 0.183         | -     |
| 52836          | Medium | 0.002         | 0.516 | 0.002         | 0.946 | 0.061         | -     | 0.023         | 0.825 | 0.755         | -     |
| 52856          | Medium | 0.001         | 0.756 | 0.007         | 0.952 | 0.045         | 0.831 | 0.007         | 0.925 | 0.064         | -     |
| 52943          | Medium | 0.035         | 0.993 | 0.104         | -     | 0.473         | -     | 0.013         | 0.685 | 0.842         | -     |
| 55598          | Medium | 0.000         | 0.496 | 0.016         | 0.971 | 0.010         | 0.966 | 0.031         | 0.570 | 0.009         | 0.486 |
| 56029          | Medium | 0.001         | 0.292 | 0.591         | -     | 0.231         | -     | 0.013         | 0.595 | 0.000         | 0.522 |
| 56065          | Medium | 0.000         | 0.353 | 0.001         | 0.627 | 0.008         | 0.953 | 0.011         | 0.897 | 0.000         | 0.613 |
| 56079          | Medium | 0.000         | 0.123 | 0.032         | 0.542 | 0.085         | -     | 0.000         | 0.509 | 0.014         | 0.909 |
| 56080          | Medium | 0.000         | 0.199 | 0.008         | 0.573 | 0.002         | 0.588 | 0.005         | 0.696 | 0.031         | 0.983 |
| 56125          | Medium | 0.000         | 0.319 | 0.089         | -     | 0.045         | 0.926 | 0.162         | -     | 0.003         | 0.271 |
| 56144          | Medium | 0.000         | 0.666 | 0.000         | 0.183 | 0.002         | 0.411 | 0.001         | 0.365 | 0.005         | 0.305 |
| 56146          | Medium | 0.000         | 0.407 | 0.086         | -     | 0.032         | 0.943 | 0.343         | -     | 0.334         | -     |
| 56182          | Medium | 0.000         | 0.388 | 0.735         | -     | 0.862         | -     | 0.000         | 0.638 | 0.000         | 0.511 |
| 56312          | Medium | 0.060         | -     | 0.239         | -     | 0.278         | -     | 0.113         | -     | 0.714         | -     |
| 56444          | Medium | 0.001         | 0.395 | 0.901         | -     | 0.007         | 0.345 | 0.041         | 0.800 | 0.070         | -     |
| 56543          | Medium | 0.009         | 0.288 | 0.599         | -     | 0.299         | -     | 0.038         | 0.807 | 0.013         | 0.564 |

|       |      |       |       |       |       |       |       |       |       |       |       |
|-------|------|-------|-------|-------|-------|-------|-------|-------|-------|-------|-------|
| 52908 | High | 0.015 | 0.603 | 0.242 | -     | 0.077 | 0.077 | 0.696 | -     | 0.005 | 0.513 |
| 55228 | High | 0.003 | 0.830 | 0.013 | 0.837 | 0.155 | -     | 0.006 | 0.913 | 0.095 | -     |
| 55279 | High | 0.003 | 0.641 | 0.371 | -     | 0.325 | -     | 0.234 | -     | 0.000 | 0.174 |
| 55299 | High | 0.003 | 0.999 | 0.939 | -     | 0.034 | 0.849 | 0.862 | -     | 0.042 | 0.533 |
| 55472 | High | 0.001 | 0.397 | 0.957 | -     | 0.041 | 0.819 | 0.123 | -     | 0.011 | 0.609 |
| 55578 | High | 0.000 | 0.888 | 0.890 | -     | 0.112 | -     | 0.040 | 0.785 | 0.072 | -     |
| 55655 | High | 0.000 | 0.920 | 0.007 | 0.552 | 0.006 | 0.862 | 0.428 | -     | 0.236 | -     |
| 55696 | High | 0.004 | 0.812 | 0.635 | -     | 0.019 | 0.887 | 0.005 | 0.815 | 0.256 | -     |
| 56004 | High | 0.143 | -     | 0.870 | -     | 0.274 | -     | 0.496 | -     | 0.124 | -     |
| 56034 | High | 0.002 | 0.399 | 0.224 | -     | 0.012 | 0.869 | 0.482 | -     | 0.037 | 0.478 |
| 56038 | High | 0.003 | 0.508 | 0.423 | -     | 0.031 | 0.581 | 0.060 | -     | 0.006 | 0.874 |
| 56046 | High | 0.001 | 0.273 | 0.236 | -     | 0.057 | -     | 0.016 | 0.773 | 0.009 | 0.451 |
| 56106 | High | 0.004 | 0.658 | 0.931 | -     | 0.004 | 0.773 | 0.102 | -     | 0.027 | 0.418 |

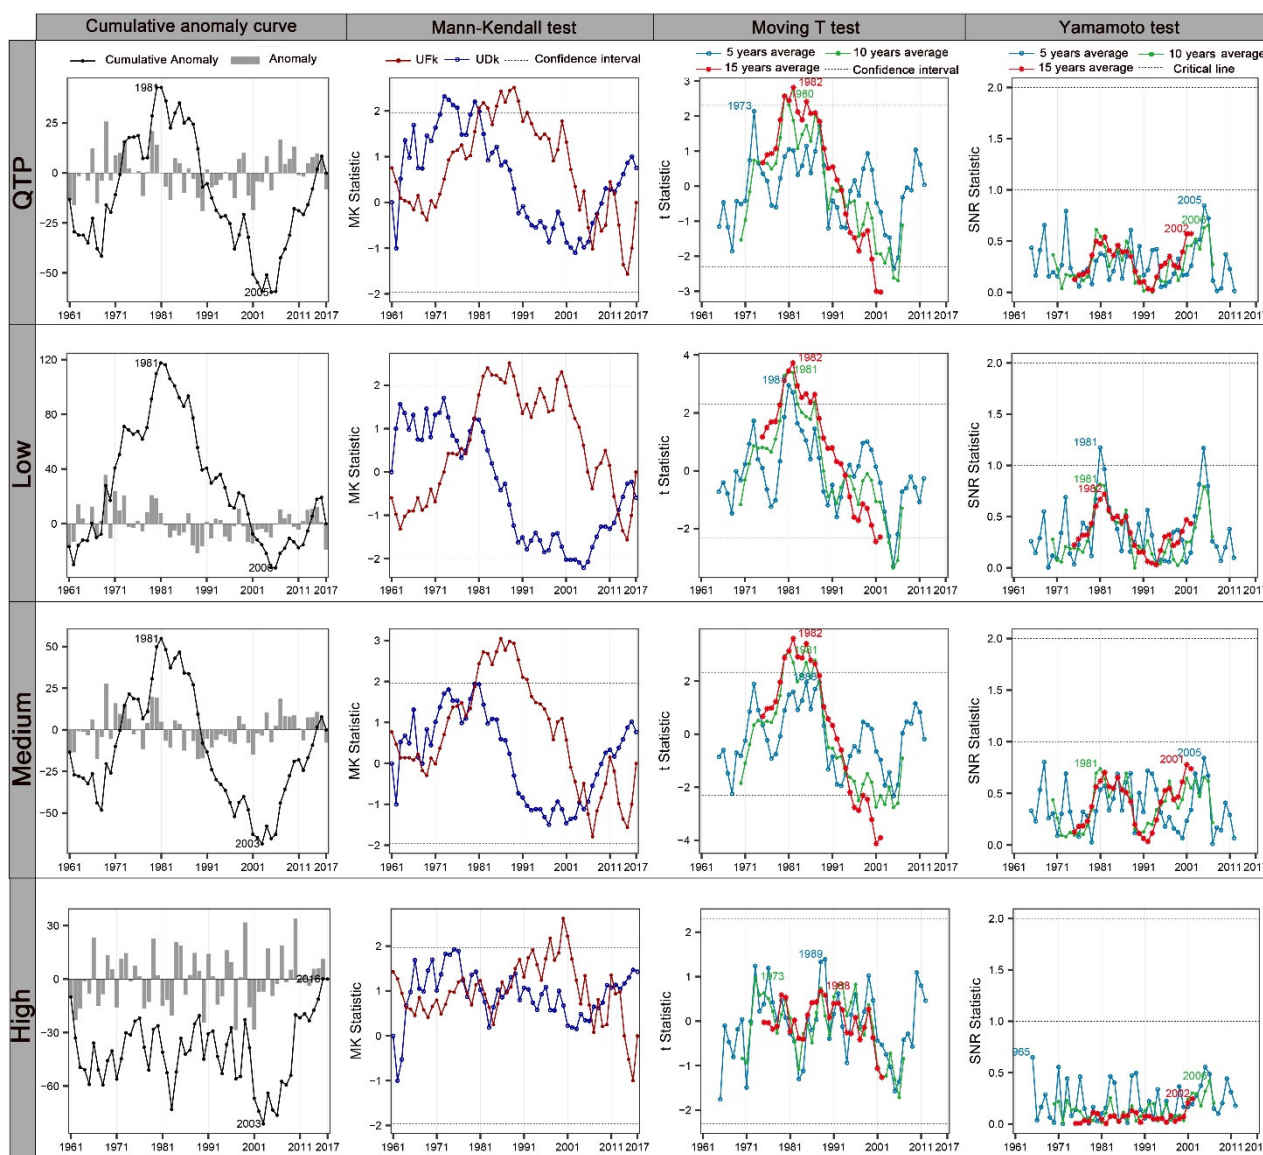

Figure S1. The results of mutation analysis of spring  $ET_0$  on different elevation zones.

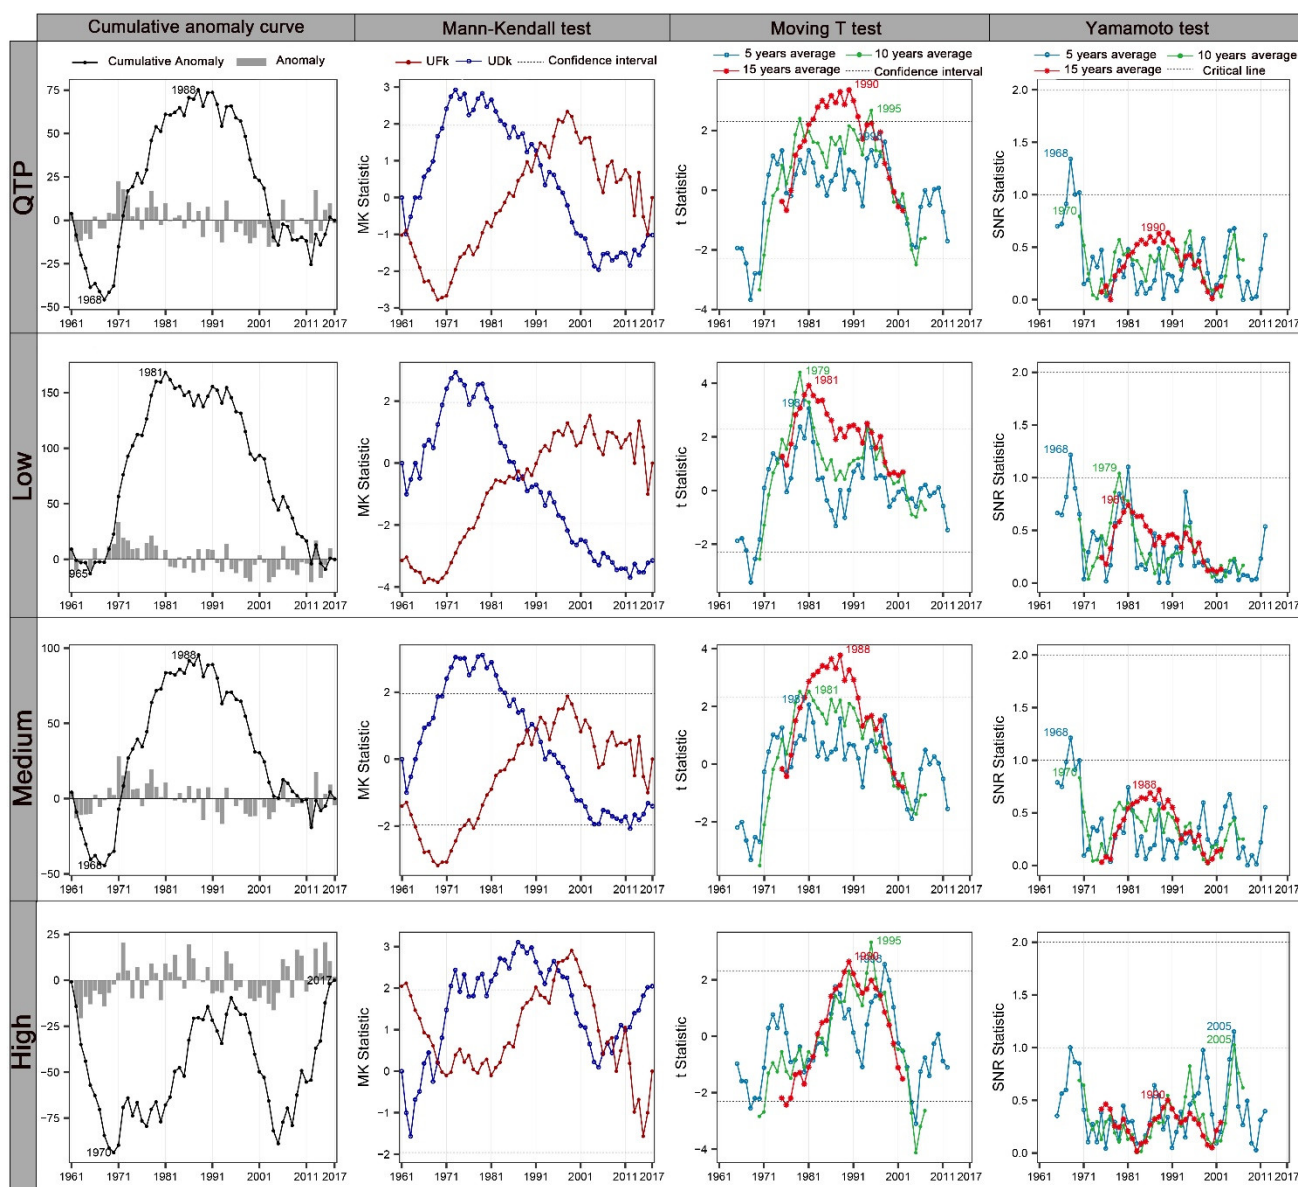

**Figure S2.** The results of mutation analysis of summer  $ET_0$  on different elevation zones.

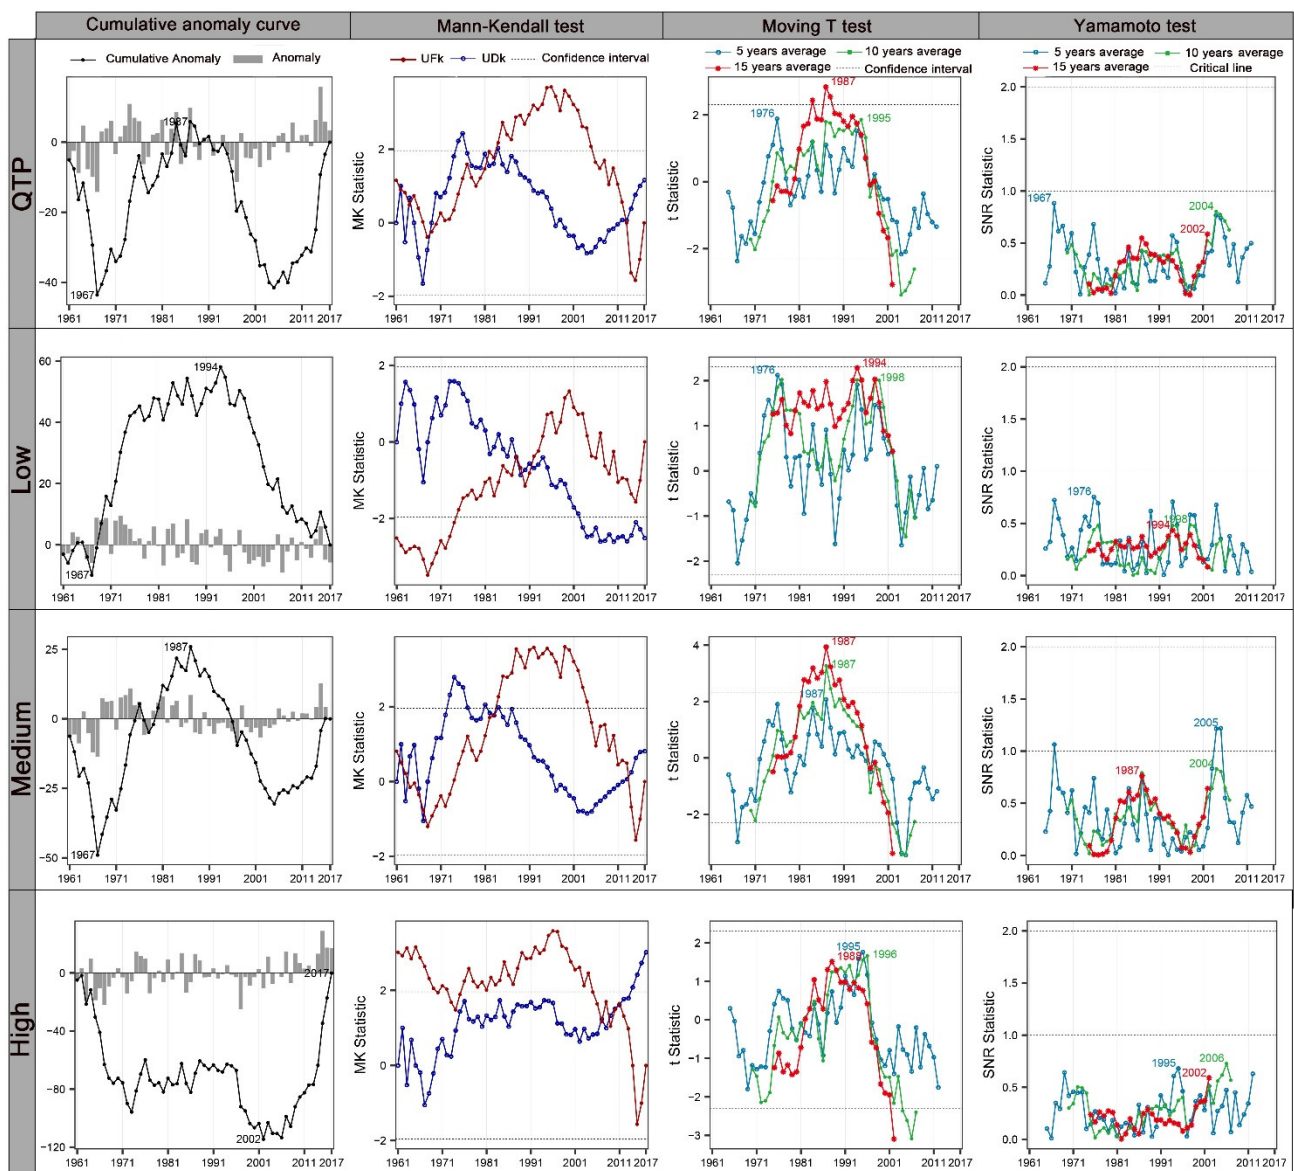

Figure S3. The results of mutation analysis of autumn  $ET_0$  on different elevation zones.



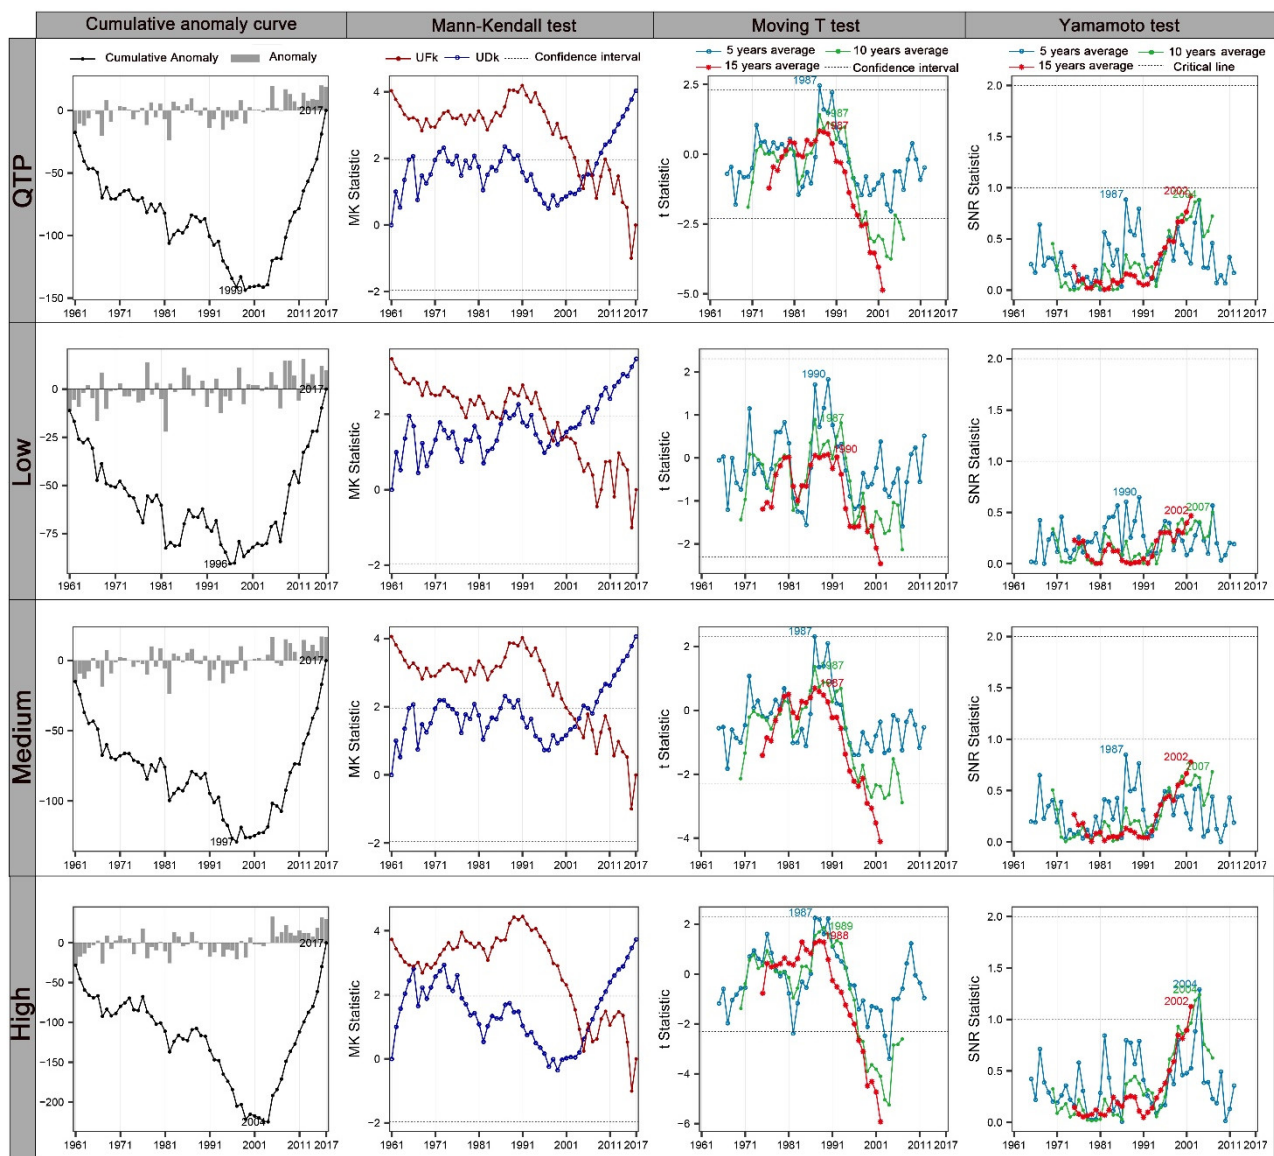

Figure S4. The results of mutation analysis of winter  $ET_0$  on different elevation zones.

**Table S2.** The mutation years for  $ET_0$  of four seasons as a result of section 3.1.2.

| Region | Spring          | Summer          | Autumn          | Winter      |
|--------|-----------------|-----------------|-----------------|-------------|
| QTP    | 1981(-);2005(+) | 1991(-);2005(+) | 1987(-)         | No mutation |
| Low    | 1981(-);2005(+) | 1981(-);2005(+) | 1994(-)         | No mutation |
| Medium | 1981(-);2005(+) | 1991(-);2005(+) | 1987(-);2005(+) | No mutation |
| High   | No mutation     | 1995(-);2005(+) | No mutation     | 2004(+)     |

<sup>a</sup>The sign (-) indicates the descending mutation in the year of mutation, and (+) is the ascending mutation.

**Table S3.** Z-values from the MK test of  $ET_0$  in four seasons in different elevation zones in different periods.

| Season | Region | 1961–2017 | Before The First Mutation | Between Two Mutations | After The Second Mutation |
|--------|--------|-----------|---------------------------|-----------------------|---------------------------|
| Spring | QTP    | 0.75      | 2.17*                     | 0.02                  | 0.18                      |
|        | Low    | −0.58     | 1.20                      | −0.42                 | 0.55                      |
|        | Medium | 0.76      | 1.91                      | 0.42                  | −0.42                     |
|        | High   | 1.42      |                           |                       |                           |
| Summer | QTP    | −1.01     | 1.43                      | −1.97*                | 0.43                      |
|        | Low    | −3.13     | 2.04*                     | −1.76                 | 0.42                      |
|        | Medium | −1.39     | 1.03                      | −1.42                 | −0.18                     |
|        | High   | 2.04      | 2.43*                     | −2.15*                | 0.92                      |
| Autumn | QTP    | 1.15      | 1.37                      |                       | 2.24*                     |
|        | Low    | −2.50     | −0.57                     |                       | 0.12                      |
|        | Medium | 0.80      | 1.50                      | −0.76                 | 1.52                      |
|        | High   | 3.01      |                           |                       |                           |
| Winter | QTP    | 4.03      |                           |                       |                           |
|        | Low    | 3.46      |                           |                       |                           |
|        | Medium | 4.05      |                           |                       |                           |
|        | High   | 3.72      | 0.04                      |                       | 0.88                      |

\*Significance level of 0.05 ( $P < 0.05$ ).\*\*Significance level of 0.01 ( $P < 0.01$ ).\*\*\*Significance level of 0.001 ( $P < 0.001$ ).
